# Supplementary material for: Estimates of tree root water uptake from soil moisture profile dynamics
Source: Copernicus journal article supplement (doi:10.5194/bg-17-5787-2020), 2020-11-24
Supplement: Supplementary file 1 [file bg-17-5787-2020-supplement.zip]

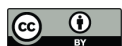

## *Supplement of*

# **Estimates of tree root water uptake from soil moisture profile dynamics**

**Conrad Jackisch et al.**

*Correspondence to:* Conrad Jackisch ([conrad.jackisch@tbt.tu-freiberg.de](mailto:conrad.jackisch@tbt.tu-freiberg.de))

- [bg-17-5787-2020-supplement-title-page.pdf](#)
- [supplement](#)
  - [RWU\\_SF\\_Biogeosciences.ipynb](#)
  - [precip\\_radiation.csv](#)
  - [sapvelocity.csv](#)
  - [soilmoisture.csv](#)
  - [vG\\_RWU.csv](#)
  - [vG\\_conv.py](#)

The copyright of individual parts of the supplement might differ from the CC BY 4.0 License.
